# Supplementary material for: Hierarchical transfer of chiral information from the molecular to the mesoscopic scale by Langmuir–Blodgett deposition of tetrasteroid-porphyrins
Source: Royal Society of Chemistry journal article supplement (doi:10.1039/c6nj02947g), 2016-12-13
Supplement: c6nj02947g1.pdf [file c6nj02947g1.pdf]

Paper:

Hierarchical transfer of chiral information from the molecular to the mesoscopic scale by  
Langmuir-Blodgett deposition of tetrasteroid-porphyrins

*Raffaella Lettieri,<sup>a</sup> Lenka Cardová,<sup>b</sup> Emanuela Gatto,<sup>a</sup> Claudia Mazzuca,<sup>a</sup> Antonio Palleschi,<sup>a</sup>  
Pavel Drašar,<sup>b</sup> Donato Monti,<sup>a</sup> Ernesto Placidi<sup>c</sup> and Mariano Venanzi<sup>a\*</sup>*

Prof. Mariano Venanzi, Dipartimento di Scienze e Tecnologie Chimiche, University of Rome 'Tor  
Vergata', via della ricerca scientifica 1, 00133 Rome (Italy), [venanzi@uniroma2.it](mailto:venanzi@uniroma2.it)

## Electronic Supplementary Information

### ESI1. Synthesis of the tetrasteroid porphyrins investigated

**TSP** – [4-[10,15,20-tris[4-[4-[(3R,5R,8R,9S,10S,13R,14S,17R)-3-hydroxy-10,13-dimethyl-2,3,4,5,6,7,8,9,11,12,14,15,16,17-tetradecahydro-1H-cyclopenta[a]phenanthren-17-yl]pentanoyloxy]phenyl]porphyrin-5-yl]phenyl], 4-[(3R,5R,8R,9S,10S,13R,14S,17R)-3-hydroxy-10,13-dimethyl-2,3,4,5,6,7,8,9,11,12,14,15,16,17-tetradecahydro-1H-cyclopenta[a]phenanthren-17-yl]pentanoate.

4-[(3R,5R,8R,9S,10S,13R,14S,17R)-10,13-dimethyl-3-(2,2,2-trifluoroacetyl)oxy-2,3,4,5,6,7,8,9,11,12,14,15,16,17-tetradecahydro-1H-cyclopenta[a]phenanthren-17-yl]pentanoic acid was dissolved in toluene (15 ml), stirred and COCl<sub>3</sub> (2ml) added drop wisely. After 1.5 h the residual COCl<sub>2</sub> was removed by evaporation with toluene repeatedly and 67 mg of 5,10,15,20-tetrakis(4-hydroxy-phenyl)porphyrin (HTPP) dissolved in pyridine (10 ml) was added. The reaction mixture was heated to 75°C, evaporated and purified by column chromatography (silica gel, elution CH<sub>2</sub>Cl<sub>2</sub>). The desired fraction was evaporated, subsequently dissolved in THF:MeOH 1:1 (10 ml) and washed with saturated solution of NaHCO<sub>3</sub> (1 ml) to deprotect the lithocholic acid. Stirred for additional 2 hours, afterwards it was purified by flash chromatography (silica gel, CH<sub>2</sub>Cl<sub>2</sub>:MeOH 50:1). TSP (35mg) was obtained with 17% overall yield.

<sup>1</sup>H NMR (300 MHz, CDCl<sub>3</sub>) -3.10 s (2 H), 0.67 s (12 H), 0.94 s (12 H), 1.00 d (*J*=5.86 Hz, 12 H), 1.03 - 2.05 m (104 H), 2.29 - 2.61 m (8 H), 3.12 - 3.24 m (4 H), 7.20 - 7.28 dd (8 H), 7.90 - 7.98 dd (8 H), 8.60 - 8.64 s (8 H), 8; C<sub>140</sub>H<sub>182</sub>N<sub>4</sub>O<sub>12</sub> calculated monoisotopic mass: 2111.3, found: MALDI-TOF 2112.3 [M+1].

**TSPc** - [4-[10,15,20-tris[4-[4-[(3R,5S,7R,8R,9S,10S,12S,13R,14S,17R)-3,7,12-trihydroxy-10,13-dimethyl-2,3,4,5,6,7,8,9,11,12,14,15,16,17-tetradecahydro-1H-cyclopenta[a]phenanthren-17-yl]pentanoyloxy]phenyl]porphyrin-5-yl]phenyl] 4-[(3R,5S,7R,8R,9S,10S,12S,13R,14S,17R)-3,7,12-trihydroxy-10,13-dimethyl-2,3,4,5,6,7,8,9,11,12,14,15,16,17-tetradecahydro-1H-cyclopenta[a]phenanthren-17-yl]pentanoate.

4-[(3R,5R,7R,8R,9S,10S,12S,13R,14S,17R)-7,12-dihydroxy-10,13-dimethyl-3-(2,2,2-trifluoroacetyl)oxy-2,3,4,5,6,7,8,9,11,12,14,15,16,17-tetradecahydro-1H-cyclopenta[a]phenanthren-17-yl]pentanoic acid (295mg, 6ekv.) was added to a mixture of HTPP (70mg, 0,1 mmol) (15 ml), EDC.HCl (115mg, 6ekv.) and DMAP (12mg, 1ekv) in DMF and stirred overnight, evaporated under reduced pressure and chromatographed (silica gel, CH<sub>2</sub>Cl<sub>2</sub>:MeOH 30:1). The desired fraction

was evaporated under reduced pressure, dissolved in THF:MeOH 1:1 (10 ml) and washed with saturated solution of NaHCO<sub>3</sub> (1 ml), stirred for 2 h, evaporated and chromatographed on column (silica gel, CH<sub>2</sub>Cl<sub>2</sub>:MeOH 10:1). The desired fraction was evaporated under reduced pressure. 24 mg of TSPc was obtained, overall yield: 9%.

<sup>1</sup>H NMR (300 MHz, CDCl<sub>3</sub>) -3.10 s (2 H), 0.67 s (12 H), 0.94 s (12 H), 1.00 d (*J*=5.86 Hz, 12 H), 1.03 - 2.05 m (104 H), 2.29 - 2.61 m (8 H), 3.12 - 3.24 m (4 H), 3.56-3.60 m (4 H), 3.76-3.80 m (4 H), 7.20 - 7.28 dd (8 H), 7.90 - 7.98 dd (8 H), 8.60 - 8.64 s (8 H), 8; C<sub>140</sub>H<sub>182</sub>N<sub>4</sub>O<sub>20</sub> calculated monoisotopic mass: 2239.3 found: MALDI-TOF 2240.3 [M+1].

## ESI2. Definition of the torsional angles minimized in the Molecular Mechanics calculations.

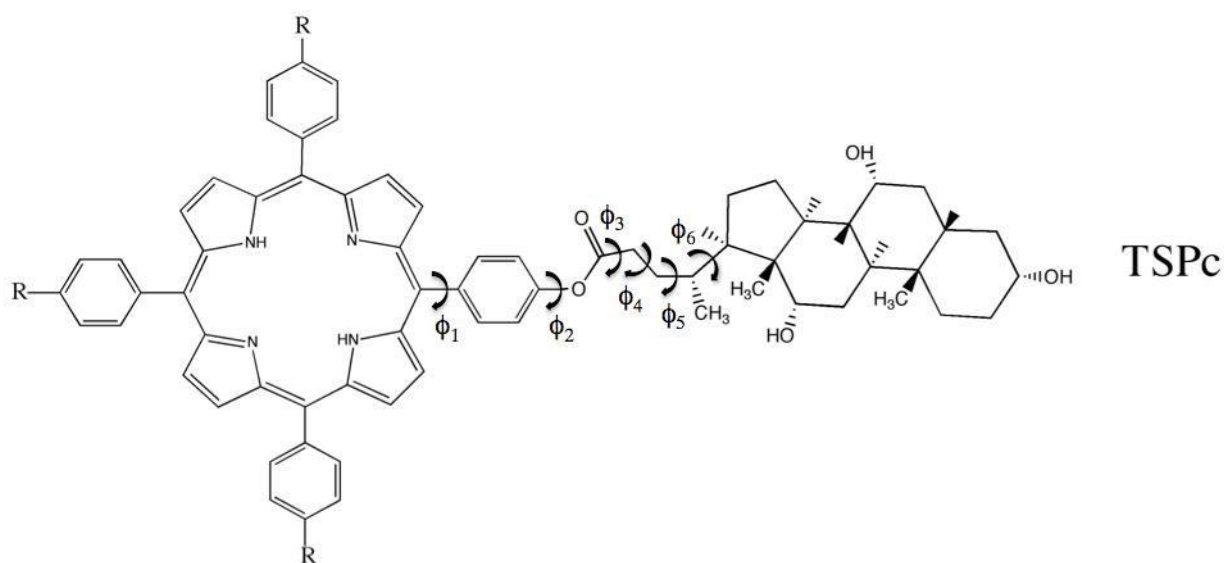

**Figure S1.** Torsional angles minimized in the MM calculations using the rotational isomeric state approximation.

**ESI3. Absorption and fluorescence emission spectra of TSP and TSPc in DMSO and DMSO/H<sub>2</sub>O solutions.**

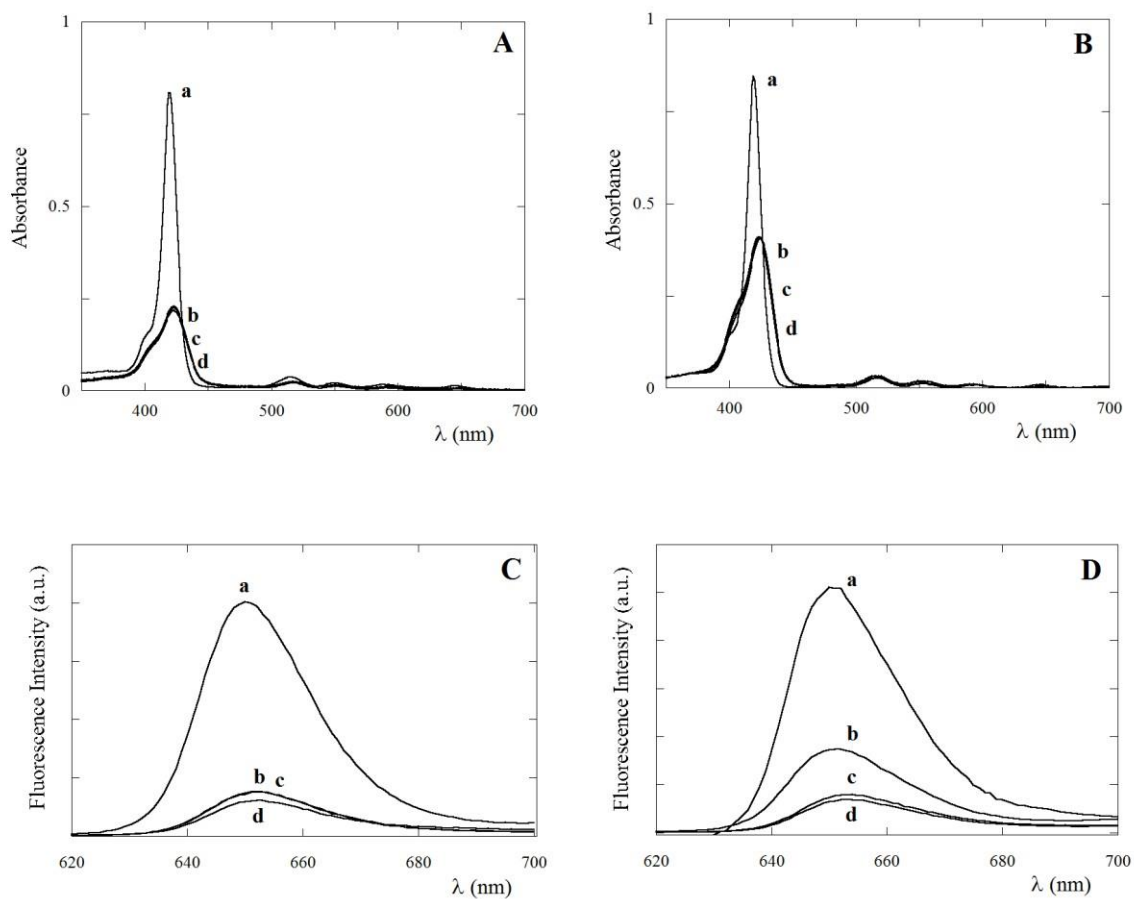

**Figure S2.** UV-Vis absorption and fluorescence emission spectra of TSP (A, C) and TSPc (B, D) in DMSO (a) and in DMSO/H<sub>2</sub>O 70/30 (b), 50/50 (c) and 30/70 v/v (d).

**ESI4. Circular dichroism spectra of TSP and TSPc in DMSO and DMSO/H<sub>2</sub>O mixtures.**

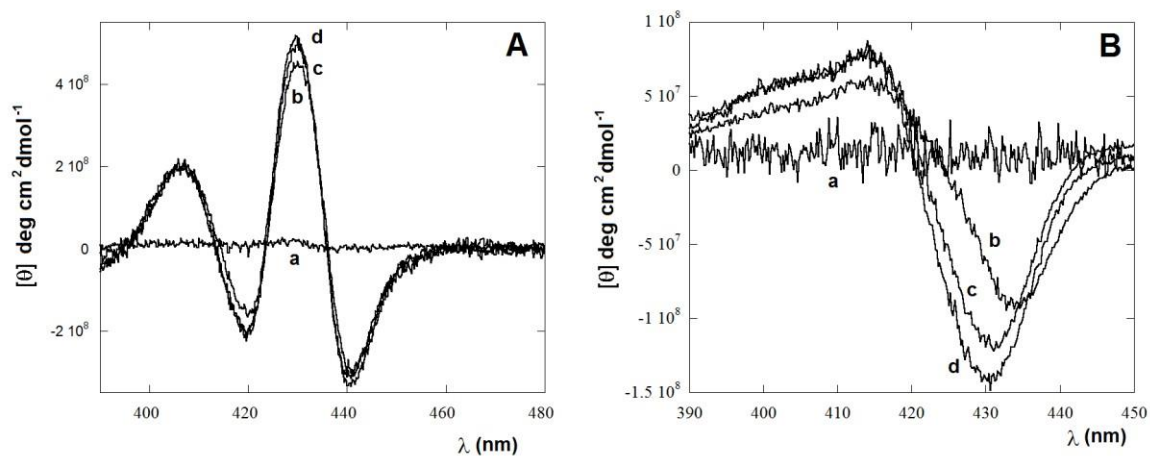

**Figure S3.** CD spectra of TSP (A) and TSPc (B) in DMSO/H<sub>2</sub>O for different mixture compositions:

a) DMSO; (b) 70/30, (c) 50/50 and (d) 30/70 DMSO/H<sub>2</sub>O v/v.

**ESI5. Circular dichroism spectra of TSP and TSPc films obtained by casting**

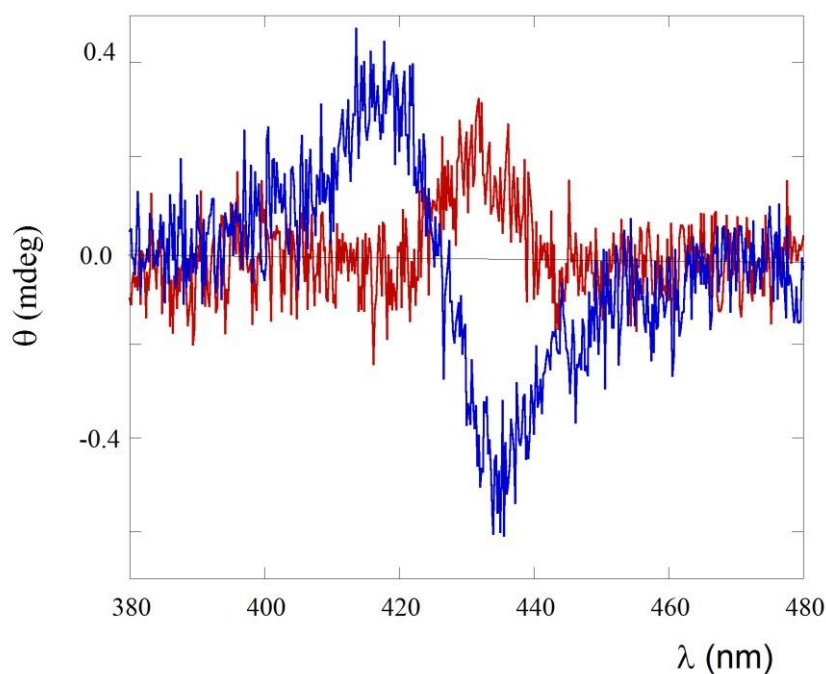

**Figure S4.** CD spectra of TSP (red) and TSPc (blue) films obtained by casting deposition of micromolar chloroform solutions.

**ESI6. Fluorescence microscopy imaging of TSP and TSPc films obtained by casting**

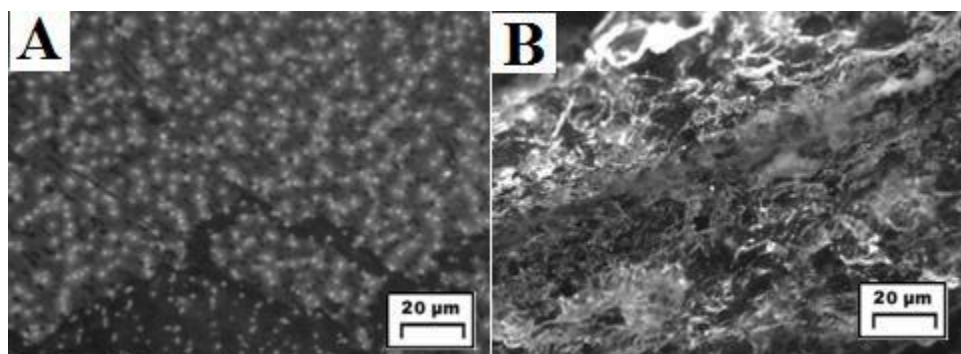

**Figure S5.** Fluorescence microscopy imaging of TSP (A) and TSPc (B) films obtained by casting deposition of micromolar chloroform solutions.

**ESI7. Fluorescence microscopy imaging of a TSP monolayer**

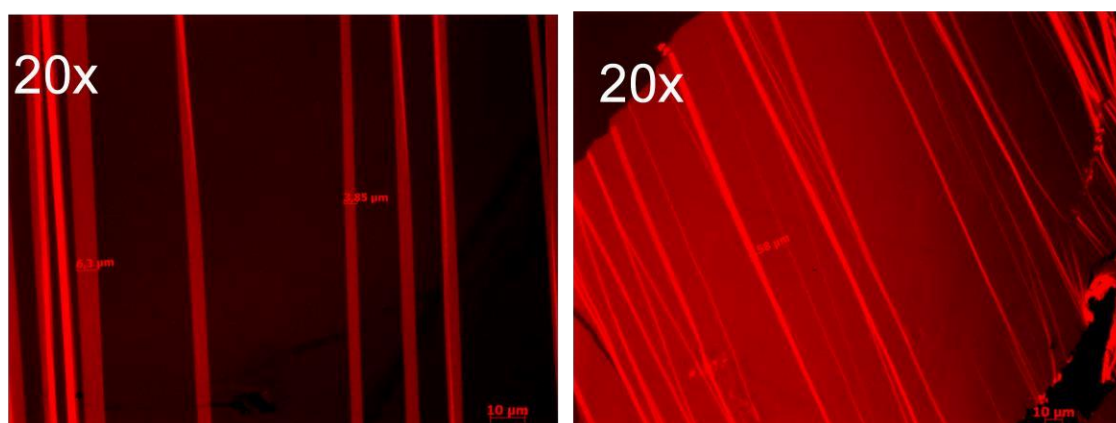

**Figure S6.** Fluorescence imaging of a TSP monolayer at a surface pressure above the LE→LC transition.

**ESI8. AFM imaging of TSP and TSPc films on mica at  $\pi=60$  mN/m.**

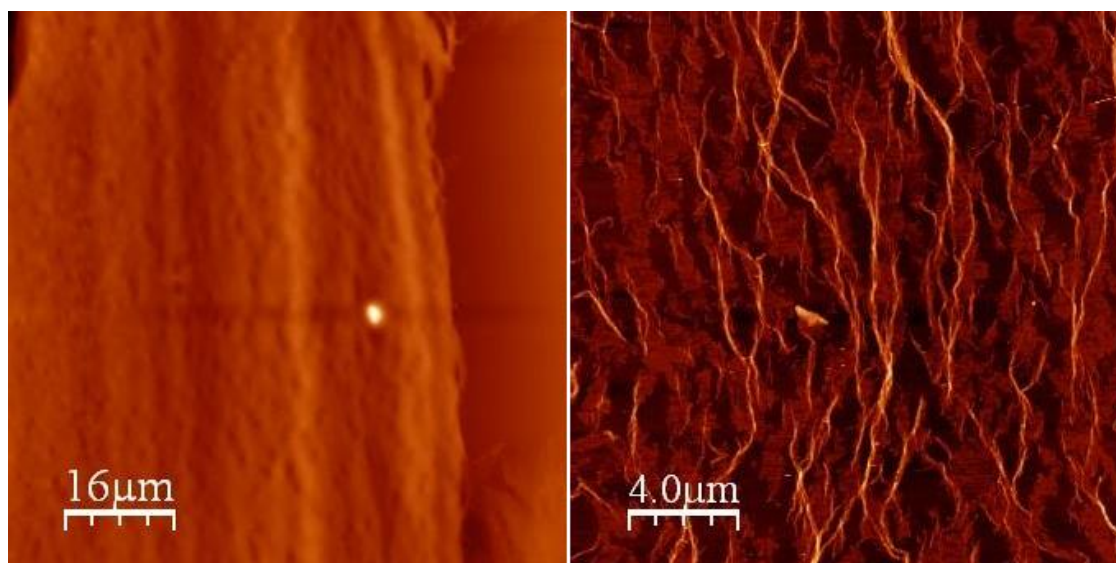

**Figure S7.** AFM images of TSP (left) and TSPc (right) films deposited on mica at a surface pressure  $\pi = 60$  mN/m.

**ESI9. Minimum energy conformers of TSP and TSPc dimers.**

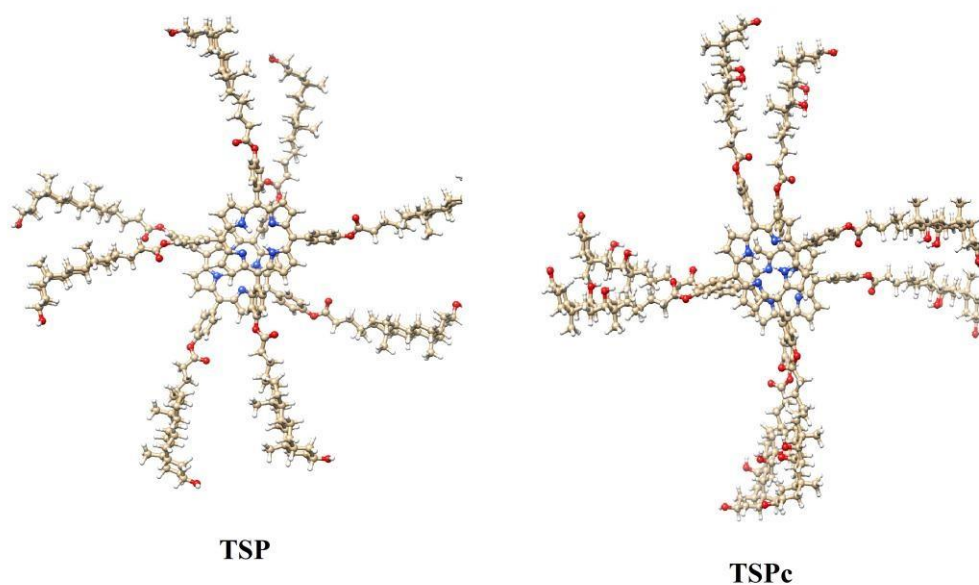

**Figure S8.** Minimum energy conformers of the TSP and TSPc dimers. Red: Oxygen atoms; Blue: Nitrogen. Note the anticlockwise (P-helicity) winding of the four steroid substituents in both compounds.
